# Supplementary material
Source: publisher figshare collection journal article supplement (https://sage.figshare.com/ndownloader/files/17282543)
Supplement: Supplementary file 1 [file 17282543]

**Table 1: Categorisation of complaint issues using the Health Complaints Analysis Tool (HCAT)**

| Domain     | Category                  | Subcategory          | Complaint issue                    | No. of issues | Total |
|------------|---------------------------|----------------------|------------------------------------|---------------|-------|
| Clinical   | Quality (149)             | Examinations         | Failure to investigate             | 4             | 6     |
|            |                           |                      | Tests                              | 1             |       |
|            |                           |                      | Not taking radiographs             | 1             |       |
|            |                           | Patient journey      | Lack of follow up                  | 4             | 5     |
|            |                           |                      | Patient flow issues                | 1             |       |
|            |                           | Quality of care      | Care/treatment                     | 1             | 116   |
|            |                           |                      | Care quality                       | 18            |       |
|            |                           |                      | Nursing care                       | 35            |       |
|            |                           |                      | Medical care                       | 36            |       |
|            |                           |                      | Lack of care                       | 2             |       |
|            |                           |                      | Pain management                    | 21            |       |
|            |                           |                      | Absence of due care                | 2             |       |
|            |                           |                      | Hospital acquired infection        | 1             |       |
|            |                           |                      | Poor treatment                     | 5             | 22    |
|            |                           |                      | Inadequate/inappropriate treatment | 3             |       |
|            |                           |                      | Medical treatment                  | 3             |       |
|            |                           |                      | Complication not explained         | 6             |       |
|            |                           |                      | Incorrect treatment                | 1             |       |
|            |                           |                      | Clinical treatment                 | 1             |       |
|            |                           |                      | Poor explanation of treatment      | 2             |       |
|            |                           |                      | Poor treatment plan                | 1             |       |
|            | Safety (71)               | Error in diagnosis   | Diagnosis                          | 4             | 13    |
|            |                           |                      | Missed diagnosis                   | 8             |       |
|            |                           |                      | Triage                             | 1             |       |
|            |                           | Medication errors    | Medication                         | 1             | 3     |
|            |                           |                      | Prescribing                        | 1             |       |
|            |                           |                      | Medication omission                | 1             |       |
|            |                           | Safety incidents     | Medical error                      | 4             | 49    |
|            |                           |                      | Surgical/medical complication      | 28            |       |
|            |                           |                      | Adverse event                      | 13            |       |
|            |                           |                      | Equipment Failure                  | 2             |       |
|            |                           |                      | Patient death                      | 2             |       |
|            |                           | Skills and conduct   | Clinical judgement                 | 1             | 6     |
|            |                           |                      | Incompetence/negligence            | 2             |       |
|            |                           |                      | Technical skills                   | 3             |       |
|            |                           |                      | Organisation of care               | 2             |       |
| Management | Institutional issues (61) | Bureaucracy          | Documentation issues               | 7             | 10    |
|            |                           |                      | Procedures                         | 1             |       |
|            |                           |                      | Poor environment                   | 2             | 15    |
|            |                           | Environment          | Accommodation                      | 1             |       |
|            |                           |                      | Hygiene                            | 4             |       |
|            |                           |                      | Food                               | 3             |       |
|            |                           |                      | Sanitation                         | 1             |       |
|            |                           |                      | Other patients                     | 1             |       |
|            |                           |                      | Availability of linen/blankets     | 3             |       |
|            |                           | Finance & billing    | Billing                            | 1             | 9     |
|            |                           |                      | Costs                              | 4             |       |
|            |                           |                      | Financial                          | 3             |       |
|            |                           |                      | Parking fee                        | 1             |       |
|            |                           | Service issues       | Unreturned calls                   | 1             | 26    |
|            |                           |                      | Telephone consultation             | 7             |       |
|            |                           |                      | Wrong hospital                     | 9             |       |
|            |                           |                      | System malfunctions                | 1             |       |
|            |                           |                      | Cancellations                      | 2             |       |
|            |                           |                      | Patient education                  | 1             |       |
|            |                           |                      | Parking                            | 1             |       |
|            |                           |                      | Ward allocation                    | 1             |       |
|            |                           |                      | Visiting times                     | 3             |       |
|            |                           |                      | Insufficient practical support     | 1             |       |
|            | Timing & access (67)      | Staffing & resources | Waiting time                       | 11            | 26    |
|            |                           |                      | Clinical delay                     | 1             |       |
|            |                           | Delays               | Delay in treatment                 | 6             |       |
|            |                           |                      | Timeliness                         | 3             |       |
|            |                           |                      | Delay in diagnosis                 | 2             |       |
|            |                           |                      | Delay in admission                 | 1             |       |
|            |                           |                      | Delays in outpatient department    | 2             |       |
|            |                           |                      | Discharge timing                   | 7             | 8     |
|            |                           |                      | Discharge planning                 | 1             |       |
|            |                           | Access & admission   | Access to services                 | 5             | 33    |
|            |                           |                      | Admission/appointment issues       | 10            |       |
|            |                           |                      | Appointments                       | 2             |       |
|            |                           |                      | Access/availability                | 5             |       |
|            |                           |                      | Not admitted                       | 3             |       |
|            |                           |                      | No consultation                    | 1             |       |
|            |                           |                      | Refusal to treat                   | 3             |       |

|               |                              |                                                  |                                   |    |     |
|---------------|------------------------------|--------------------------------------------------|-----------------------------------|----|-----|
| Relationships | Communication<br>(92)        | Poor communication<br>Communication<br>breakdown | Busy                              | 2  |     |
|               |                              |                                                  | Refused visit                     | 2  |     |
|               |                              |                                                  | Poor communication                | 38 | 38  |
|               |                              |                                                  | Communication breakdowns          | 6  | 13  |
|               |                              |                                                  | Lack of communication             | 7  |     |
|               |                              |                                                  | Inadequate information            | 1  | 14  |
|               |                              | Patient-staff dialogue                           | Incomplete/Inaccurate information | 3  |     |
|               |                              |                                                  | Conflicting information           | 8  |     |
|               |                              |                                                  | Misinformation                    | 2  |     |
|               |                              |                                                  | Doctor patient-relationship       | 4  | 27  |
|               |                              |                                                  | Not listening                     | 6  |     |
|               |                              |                                                  | Interpersonal communication       | 6  |     |
|               |                              |                                                  | Blamed patient                    | 1  |     |
|               |                              |                                                  | Explanations to patients          | 2  |     |
|               |                              |                                                  | Disagree care expectations        | 1  |     |
|               |                              |                                                  | Unnecessary comment               | 5  |     |
|               |                              |                                                  | Decision sharing                  | 2  |     |
|               | Humaneness /<br>caring (113) | Respect, dignity &<br>caring                     | Lack of concern                   | 1  | 81  |
|               |                              |                                                  | Rude behaviour                    | 46 |     |
|               |                              |                                                  | Respect and caring                | 5  |     |
|               |                              |                                                  | Uncaring                          | 12 |     |
|               |                              |                                                  | Insensitive                       | 5  |     |
|               |                              |                                                  | Insufficient empathy              | 4  |     |
|               |                              |                                                  | Lack of privacy                   | 1  |     |
|               |                              |                                                  | Insufficient emotional support    | 7  |     |
|               |                              |                                                  | Attitude of staff                 | 23 | 32  |
|               |                              |                                                  | Attitude/behaviour                | 9  |     |
|               | Patient rights<br>(12)       | Abuse                                            | Emotional/verbal abuse            | 2  | 2   |
|               |                              | Confidentiality                                  | Patient confidentiality           | 3  | 3   |
|               |                              | Consent                                          | Problems in consent               | 5  | 6   |
|               |                              | Discrimination                                   | Coercion                          | 1  |     |
|               |                              |                                                  | Discrimination against patient    | 1  | 1   |
| Miscellaneous |                              |                                                  |                                   |    | 2   |
| Total         |                              |                                                  |                                   |    | 567 |
